# Supplementary material for: Small Extracellular Vesicles from Hypoxic Triple-Negative Breast Cancer Cells induce Oxygen-dependent Cell Invasion
Source: Preprints.org preprint supplement (doi:10.20944/preprints202208.0462.v1), 2022-08-26
Supplement: Supplementary file 1 [file supplementary]

**Table S2.** Differential proteomic profile of MDA-MB-231 cells exposed to normoxia or hypoxia, with or without SEVh treatment (p<0.05)

| **Protein Code** | **Protein Name** | ***f* value** | ***p* value** | **- log10(*p*)** | **FDR*** | **Tukey's HSD**** |
| --- | --- | --- | --- | --- | --- | --- |
| RPAB1 | DNA-directed RNA polymerases I, II, and III subunit RPABC1 | 2900.1 | 1.75E-12 | 11.756 | 4.58E-09 | Hyp_SEVh x Hyp_PBS  Hyp_SEVh x Norm_PBS  Norm_SEVh x Hyp_SEVh |
| NPL4 | Nuclear protein localization protein 4 homolog | 1353.2 | 3.68E-11 | 10.434 | 4.81E-08 | Hyp_SEVh x Hyp_PBS  Hyp_SEVh x Norm_PBS  Norm_SEVh x Hyp_SEVh |
| KT3K | Ketosamine-3-kinase | 965.53 | 1.41E-10 | 9.849 | 1.23E-07 | Hyp_SEVh x hyp_PBS  Hyp_SEVh x Norm_PBS  Norm_SEVh x Hyp_SEVh |
| MRM3 | rRNA methyltransferase 3, mitochondrial | 746.72 | 3.94E-10 | 9.405 | 2.58E-07 | Hyp_SEVh x Hyp_PBS  Hyp_SEVh x Norm_PBS  Norm_SEVh x Hyp_SEVh |
| ADDA | Alpha-adducin | 681.92 | 5.66E-10 | 9.247 | 2.96E-07 | Hyp_SEVh x Hyp_PBS  Hyp_SEVh x Norm_PBS  Norm_SEVh x Hyp_SEVh |
| GDE | Glycogen debranching enzyme | 576.74 | 1.10E-09 | 8.958 | 4.80E-07 | Norm_PBS x Hyp_PBS  Hyp_SEVh x Hyp_PBS  Norm_SEVh x Hyp_PBS |
| GMPR1 | GMP reductase 1 | 357.98 | 7.33E-09 | 8.135 | 2.60E-06 | Norm_PBS x Hyp_PBS  Hyp_SEVh x Hyp_PBS  Norm_SEVh x Hyp_PBS |
| BAG6 | Large proline-rich protein BAG6 | 349.14 | 8.10E-09 | 8.092 | 2.60E-06 | Hyp_SEVh x Hyp_PBS  Hyp_SEVh x Norm_PBS  Norm_SEVh x Hyp_SEVh |
| SETD7 | Histone-lysine N-methyltransferase SETD7 | 335.79 | 9.45E-09 | 8.024 | 2.60E-06 | Norm_PBS x Hyp_PBS  Hyp_SEVh x Hyp_PBS  Norm_SEVh x Hyp_PBS |
| GCP2 | Gamma-tubulin complex component 2 | 331.61 | 9.93E-09 | 8.003 | 2.60E-06 | Norm_SEVh x Hyp_PBS  Norm_SEVh x Norm_PBS  Norm_SEVh x Hyp_SEVh |
| CL029 | Uncharacterized protein C12orf29 | 265.05 | 2.41E-08 | 7.617 | 5.74E-06 | Norm_PBS x Hyp_PBS  Hyp_SEVh x Hyp_PBS  Norm_SEVh x Hyp_PBS  Hyp_SEVh x Norm_PBS  Norm_SEVh x Hyp_SEVh |
| KAD4 | Adenylate kinase 4, mitochondrial | 196.9 | 7.80E-08 | 7.108 | 1.70E-05 | Hyp_SEVh x Hyp_PBS  Hyp_SEVh x Norm_PBS  Norm_SEVh x Hyp_SEVh |
| AEDO | 2-aminoethanethiol dioxygenase | 165.23 | 1.56E-07 | 6.808 | 3.07E-05 | Norm_PBS x Hyp_PBS  Hyp_SEVh x Hyp_PBS  Norm_SEVh x Hyp_PBS |
| LYRM7 | Complex III assembly factor LYRM7 | 162.91 | 1.64E-07 | 6.784 | 3.07E-05 | Norm_PBS x Hyp_PBS  Norm_SEVh x Hyp_PBS  Hyp_SEVh x Norm_PBS  Norm_SEVh x Hyp_SEVh |
| HSP72 | Heat shock-related 70 kDa protein 2 | 153.85 | 2.06E-07 | 6.686 | 3.51E-05 | Norm_PBS x Hyp_PBS  Hyp_SEVh x Hyp_PBS  Norm_SEVh x Hyp_PBS |
| PAPS1 | Bifunctional 3'-phosphoadenosine 5'-phosphosulfate synthase 1 | 152.18 | 2.15E-07 | 6.668 | 3.51E-05 | Norm_PBS x Hyp_PBS  Norm_SEVh x Hyp_PBS  Hyp_SEVh x Norm_PBS  Norm_SEVh x Hyp_SEVh |
| EPS15 | Epidermal growth factor receptor substrate 15 | 148.61 | 2.36E-07 | 6.627 | 3.63E-05 | Norm_PBS x Hyp_PBS  Hyp_SEVh x Hyp_PBS  Norm_SEVh x Hyp_PBS |
| RBX1 | E3 ubiquitin-protein ligase RBX1 | 144.55 | 2.63E-07 | 6.580 | 3.82E-05 | Norm_PBS x Hyp_PBS  Hyp_SEVh x Hyp_PBS  Norm_SEVh x Hyp_PBS |
| FBX50 | F-box only protein 50 | 112.57 | 6.99E-07 | 6.156 | 9.62E-05 | Norm_PBS x Hyp_PBS  Hyp_SEVh x Hyp_PBS  Norm_SEVh x Hyp_PBS |
| BABA1 | BRISC and BRCA1-A complex member 1 | 104.13 | 9.47E-07 | 6.024 | 1.24E-04 | Norm_PBS x Hyp_PBS  Norm_SEVh x Hyp_PBS  Hyp_SEVh x Norm_PBS  Norm_SEVh x Hyp_SEVh |
| TES | Testin | 95.909 | 1.30E-06 | 5.885 | 1.61E-04 | Norm_PBS x Hyp_PBS  Hyp_SEVh x Hyp_PBS  Norm_SEVh x Hyp_PBS  Hyp_SEVh x Norm_PBS  Norm_SEVh x Hyp_SEVh |
| GBRL2 | Gamma-aminobutyric acid receptor-associated protein-like 2 | 94.916 | 1.36E-06 | 5.867 | 1.61E-04 | Norm_PBS x Hyp_PBS  Norm_SEVh x Hyp_PBS  Hyp_SEVh x Norm_PBS  Norm_SEVh x Hyp_SEVh |
| KPRB | Phosphoribosyl pyrophosphate synthase-associated protein 2 | 88.195 | 1.80E-06 | 5.744 | 1.93E-04 | Norm_PBS x Hyp_PBS  Hyp_SEVh x Norm_PBS  Norm_SEVh x Norm_PBS |
| GSTT2;GST2 | Glutathione S-transferase theta-2B; Glutathione S-transferase theta-2 | 87.837 | 1.83E-06 | 5.737 | 1.93E-04 | Norm_PBS x Hyp_PBS  Hyp_SEVh x Hyp_PBS  Norm_SEVh x Hyp_PBS |
| UCHL5 | Ubiquitin carboxyl-terminal hydrolase isozyme L5 | 87.735 | 1.84E-06 | 5.735 | 1.93E-04 | Hyp_SEVh x Hyp_PBS  Hyp_SEVh x Norm_PBS  Norm_SEVh x Hyp_SEVh |
| DDX23 | Probable ATP-dependent RNA helicase DDX23 | 86.176 | 1.97E-06 | 5.705 | 1.98E-04 | Hyp_SEVh x Hyp_PBS  Hyp_SEVh x Norm_PBS  Norm_SEVh x Hyp_SEVh |
| COA6 | Cytochrome c oxidase assembly factor 6 homolog | 82.576 | 2.33E-06 | 5.633 | 2.25E-04 | Hyp_SEVh x Hyp_PBS  Hyp_SEVh x Norm_PBS  Norm_SEVh x Hyp_SEVh |
| BID | BH3-interacting domain death agonist | 79.736 | 2.66E-06 | 5.575 | 2.46E-04 | Norm_PBS x Hyp_PBS  Norm_SEVh x Hyp_PBS  Hyp_SEVh x Norm_PBS  Norm_SEVh x Hyp_SEVh |
| P4HA2 | Prolyl 4-hydroxylase subunit alpha-2 | 79.284 | 2.72E-06 | 5.565 | 2.46E-04 | Norm_PBS x Hyp_PBS  Norm_SEVh x Hyp_PBS  Hyp_SEVh x Norm_PBS  Norm_SEVh x Hyp_SEVh |
| CSRP2 | Cysteine and glycine-rich protein 2 | 74.86 | 3.40E-06 | 5.469 | 2.92E-04 | Norm_PBS x Hyp_PBS  Norm_SEVh x Hyp_PBS  Hyp_SEVh x Norm_PBS  Norm_SEVh x Hyp_SEVh |
| NEUA | N-acylneuraminate cytidylyltransferase | 74.487 | 3.46E-06 | 5.461 | 2.92E-04 | Norm_PBS x Hyp_PBS  Hyp_SEVh x Hyp_PBS  Norm_SEVh x Hyp_PBS  Hyp_SEVh x Norm_PBS  Norm_SEVh x Hyp_SEVh |
| DBR1 | Lariat debranching enzyme | 73.861 | 3.58E-06 | 5.446 | 2.92E-04 | Norm_PBS x Hyp_PBS  Hyp_SEVh x Norm_PBS  Norm_SEVh x Norm_PBS |
| PORIM | Porimin | 63.112 | 6.54E-06 | 5.185 | 5.18E-04 | Norm_PBS x Hyp_PBS  Norm_SEVh x Hyp_PBS  Hyp_SEVh x Norm_PBS  Norm_SEVh x Hyp_SEVh |
| CYTC | Cystatin-C | 62.636 | 6.73E-06 | 5.172 | 5.18E-04 | Norm_PBS x Hyp_PBS  Hyp_SEVh x Norm_PBS  Norm_SEVh x Norm_PBS |
| CKAP2 | Cytoskeleton-associated protein 2 | 61.221 | 7.34E-06 | 5.134 | 5.49E-04 | Norm_PBS x Hyp_PBS  Norm_SEVh x Hyp_PBS  Hyp_SEVh x Norm_PBS  Norm_SEVh x Hyp_SEVh |
| SNX12 | Sorting nexin-12 | 58.753 | 8.59E-06 | 5.066 | 6.19E-04 | Norm_PBS x Hyp_PBS  Hyp_SEVh x Norm_PBS  Norm_SEVh x Norm_PBS |
| CGL | Cystathionine gamma-lyase | 58.069 | 8.98E-06 | 5.047 | 6.19E-04 | Norm_PBS x Hyp_PBS  Hyp_SEVh x Hyp_PBS  Norm_SEVh x Hyp_PBS |
| ACYP1 | Acylphosphatase-1 | 58.043 | 9.00E-06 | 5.046 | 6.19E-04 | Norm_PBS x Hyp_PBS  Norm_SEVh x Hyp_PBS  Hyp_SEVh x Norm_PBS  Norm_SEVh x Hyp_SEVh |
| CD47 | Leukocyte surface antigen CD47 | 57.592 | 9.27E-06 | 5.033 | 6.22E-04 | Hyp_SEVh x Hyp_PBS  Hyp_SEVh x Norm_PBS  Norm_SEVh x Hyp_SEVh |
| ATG3 | Ubiquitin-like-conjugating enzyme ATG3 | 57.135 | 9.55E-06 | 5.020 | 6.25E-04 | Norm_PBS x Hyp_PBS  Norm_SEVh x Hyp_PBS  Hyp_SEVh x Norm_PBS  Norm_SEVh x Hyp_SEVh |
| KITH | Thymidine kinase, cytosolic | 55.105 | 1.10E-05 | 4.960 | 6.99E-04 | Norm_PBS x Hyp_PBS  Norm_SEVh x Hyp_PBS  Hyp_SEVh x Norm_PBS  Norm_SEVh x Hyp_SEVh |
| SRRT | Serrate RNA effector molecule homolog | 54.119 | 1.17E-05 | 4.930 | 7.31E-04 | Norm_PBS x Hyp_PBS  Hyp_SEVh x Norm_PBS  Norm_SEVh x Norm_PBS |
| PCY2 | Ethanolamine-phosphate cytidylyltransferase | 52.442 | 1.32E-05 | 4.879 | 7.95E-04 | Norm_PBS x Hyp_PBS  Hyp_SEVh x Hyp_PBS  Norm_SEVh x Hyp_PBS |
| FKBP9 | Peptidyl-prolyl cis-trans isomerase FKBP9 | 52.28 | 1.34E-05 | 4.873 | 7.95E-04 | Norm_PBS x Hyp_PBS  Norm_SEVh x Hyp_PBS  Hyp_SEVh x Norm_PBS  Norm_SEVh x Hyp_SEVh |
| PPCEL | Prolyl endopeptidase-like | 51.713 | 1.39E-05 | 4.856 | 8.11E-04 | Norm_PBS x Hyp_PBS  Hyp_SEVh x Hyp_PBS  Norm_SEVh x Hyp_PBS |
| PAPS2 | Bifunctional 3'-phosphoadenosine 5'-phosphosulfate synthase 2 | 47.31 | 1.95E-05 | 4.710 | 1.11E-03 | Norm_PBS x Hyp_PBS  Norm_SEVh x Hyp_PBS  Hyp_SEVh x Norm_PBS  Norm_SEVh x Hyp_SEVh |
| PP1R7 | Protein phosphatase 1 regulatory subunit 7 | 46.568 | 2.07E-05 | 4.684 | 1.15E-03 | Norm_PBS x Hyp_PBS  Norm_SEVh x Hyp_PBS  Hyp_SEVh x Norm_PBS  Norm_SEVh x Hyp_SEVh |
| GAL3B;GAL3A | Glutamine amidotransferase-like class 1 domain-containing protein 3, mitochondrial; Putative glutamine amidotransferase-like class 1 domain-containing protein 3B, mitochondrial | 40.451 | 3.51E-05 | 4.455 | 1.91E-03 | Norm_PBS x Hyp_PBS  Norm_SEVh x Hyp_PBS  Hyp_SEVh x Norm_PBS  Norm_SEVh x Hyp_SEVh |
| HBE | Hemoglobin subunit epsilon | 39.618 | 3.79E-05 | 4.421 | 2.02E-03 | Norm_PBS x Hyp_PBS  Hyp_SEVh x Hyp_PBS  Norm_SEVh x Hyp_PBS |
| CHSP1 | Calcium-regulated heat-stable protein 1 | 38.468 | 4.23E-05 | 4.373 | 2.21E-03 | Norm_PBS x Hyp_PBS  Hyp_SEVh x Hyp_PBS  Norm_SEVh x Hyp_PBS |
| YLPM1 | YLP motif-containing protein 1 | 33.801 | 6.83E-05 | 4.166 | 3.50E-03 | Hyp_SEVh x Hyp_PBS  Hyp_SEVh x Norm_PBS  Norm_SEVh x Hyp_SEVh |
| GALK1 | Galactokinase | 32.469 | 7.91E-05 | 4.102 | 3.98E-03 | Norm_PBS x Hyp_PBS  Norm_SEVh x Hyp_PBS  Hyp_SEVh x Norm_PBS  Norm_SEVh x Hyp_SEVh |
| PICAL | Phosphatidylinositol-binding clathrin assembly protein | 29.018 | 1.19E-04 | 3.924 | 5.88E-03 | Norm_PBS x Hyp_PBS  Norm_SEVh x Hyp_PBS  Hyp_SEVh x Norm_PBS  Norm_SEVh x Hyp_SEVh |
| STABP | STAM-binding protein | 28.388 | 1.29E-04 | 3.889 | 6.25E-03 | Norm_PBS x Hyp_PBS  Norm_SEVh x Hyp_PBS  Hyp_SEVh x Norm_PBS  Norm_SEVh x Hyp_SEVh |
| GORS2 | Golgi reassembly-stacking protein 2 | 26.761 | 1.60E-04 | 3.796 | 7.60E-03 | Norm_PBS x Hyp_PBS  Norm_SEVh x Hyp_PBS  Hyp_SEVh x Norm_PBS  Norm_SEVh x Hyp_SEVh |
| GTR3;GTR14 | Solute carrier family 2, facilitated glucose transporter member 3; Solute carrier family 2, facilitated glucose transporter member 14 | 25.888 | 1.80E-04 | 3.745 | 8.41E-03 | Norm_PBS x Hyp_PBS  Hyp_SEVh x Hyp_PBS  Norm_SEVh x Hyp_PBS |
| RPB9 | DNA-directed RNA polymerase II subunit RPB9 | 25.742 | 1.84E-04 | 3.736 | 8.43E-03 | Norm_PBS x Hyp_PBS  Hyp_SEVh x Hyp_PBS  Norm_SEVh x Hyp_PBS |
| KNTC1 | Kinetochore-associated protein 1 | 25.62 | 1.87E-04 | 3.728 | 8.43E-03 | Norm_PBS x Hyp_PBS  Hyp_SEVh x Hyp_PBS  Norm_SEVh x Hyp_PBS |
| ANLN | Anillin | 25.319 | 1.95E-04 | 3.710 | 8.64E-03 | Norm_PBS x Hyp_PBS  Norm_SEVh x Hyp_PBS  Hyp_SEVh x Norm_PBS  Norm_SEVh x Hyp_SEVh |
| TAGL | Transgelin | 24.388 | 2.23E-04 | 3.652 | 9.72E-03 | Hyp_SEVh x Hyp_PBS  Hyp_SEVh x Norm_PBS  Norm_SEVh x Hyp_SEVh |
| ZN638 | Zinc finger protein 638 | 24.009 | 2.36E-04 | 3.628 | 9.99E-03 | Norm_SEVh x Hyp_PBS  Norm_SEVh x Norm_PBS  Norm_SEVh x Hyp_SEVh |
| CHCH2;CHCH9 | Coiled-coil-helix-coiled-coil-helix domain-containing protein 2; Putative coiled-coil-helix-coiled-coil-helix domain-containing protein CHCHD2P9, mitochondrial | 23.975 | 2.37E-04 | 3.625 | 9.99E-03 | Norm_PBS x Hyp_PBS  Norm_SEVh x Hyp_PBS  Hyp_SEVh x Norm_PBS  Norm_SEVh x Hyp_SEVh |
| ERO1A | ERO1-like protein alpha | 23.765 | 2.44E-04 | 3.612 | 1.01E-02 | Norm_PBS x Hyp_PBS  Norm_SEVh x Hyp_PBS  Hyp_SEVh x Norm_PBS  Norm_SEVh x Hyp_SEVh |
| BAF | Barrier-to-autointegration factor | 23.567 | 2.52E-04 | 3.599 | 1.03E-02 | Norm_SEVh x Hyp_PBS  Norm_SEVh x Norm_PBS  Norm_SEVh x Hyp_SEVh |
| OSBP1 | Oxysterol-binding protein 1 | 22.995 | 2.75E-04 | 3.561 | 1.11E-02 | Norm_PBS x Hyp_PBS  Norm_SEVh x Hyp_PBS  Hyp_SEVh x Norm_PBS  Norm_SEVh x Hyp_SEVh |
| CNPY3 | Protein canopy homolog 3 | 22.488 | 2.97E-04 | 3.527 | 1.17E-02 | Norm_PBS x Hyp_PBS  Norm_SEVh x Hyp_PBS  Hyp_SEVh x Norm_PBS  Norm_SEVh x Hyp_SEVh |
| CARM1 | Histone-arginine methyltransferase CARM1 | 22.373 | 3.03E-04 | 3.519 | 1.17E-02 | Norm_PBS x Hyp_PBS  Hyp_SEVh x Norm_PBS  Norm_SEVh x Norm_PBS |
| ZA2G | Zinc-alpha-2-glycoprotein | 22.317 | 3.05E-04 | 3.515 | 1.17E-02 | Norm_PBS x Hyp_PBS  Norm_SEVh x Hyp_PBS  Hyp_SEVh x Norm_PBS  Norm_SEVh x Hyp_SEVh |
| HAT1 | Histone acetyltransferase type B catalytic subunit | 22.065 | 3.18E-04 | 3.498 | 1.20E-02 | Norm_PBS x Hyp_PBS  Norm_SEVh x Hyp_PBS  Hyp_SEVh x Norm_PBS  Norm_SEVh x Hyp_SEVh |
| IDI1 | Isopentenyl-diphosphate Delta-isomerase 1 | 21.991 | 3.22E-04 | 3.493 | 1.20E-02 | Norm_PBS x Hyp_PBS  Norm_SEVh x Hyp_PBS  Hyp_SEVh x Norm_PBS  Norm_SEVh x Hyp_SEVh |
| UBA6 | Ubiquitin-like modifier-activating enzyme 6 | 21.789 | 3.32E-04 | 3.478 | 1.22E-02 | Norm_PBS x Hyp_PBS  Hyp_SEVh x Norm_PBS  Norm_SEVh x Norm_PBS |
| DNM1L | Dynamin-1-like protein | 21.661 | 3.39E-04 | 3.469 | 1.23E-02 | Norm_PBS x Hyp_PBS  Hyp_SEVh x Norm_PBS  Norm_SEVh x Norm_PBS |
| TF65 | Transcription factor p65 | 21.325 | 3.58E-04 | 3.446 | 1.28E-02 | Norm_PBS x Hyp_PBS  Norm_SEVh x Hyp_PBS  Hyp_SEVh x Norm_PBS  Norm_SEVh x Hyp_SEVh |
| TOPK | Lymphokine-activated killer T-cell-originated protein kinase | 21.272 | 3.62E-04 | 3.442 | 1.28E-02 | Norm_PBS x Hyp_PBS  Norm_SEVh x Hyp_PBS  Hyp_SEVh x Norm_PBS  Norm_SEVh x Hyp_SEVh |
| HPF1 | Histone PARylation factor 1 | 20.788 | 3.92E-04 | 3.407 | 1.35E-02 | Hyp_SEVh x Hyp_PBS  Hyp_SEVh x Norm_PBS  Norm_SEVh x Hyp_SEVh |
| DLDH | Dihydrolipoyl dehydrogenase, mitochondrial | 20.767 | 3.93E-04 | 3.405 | 1.35E-02 | Norm_PBS x Hyp_PBS  Norm_SEVh x Hyp_PBS  Hyp_SEVh x Norm_PBS  Norm_SEVh x Hyp_SEVh |
| IPP2;IPP2B | Protein phosphatase inhibitor 2; Protein phosphatase inhibitor 2 family member B | 20.638 | 4.02E-04 | 3.396 | 1.37E-02 | Norm_PBS x Hyp_PBS  Hyp_SEVh x Norm_PBS  Norm_SEVh x Norm_PBS |
| SAP18 | Histone deacetylase complex subunit SAP18 | 19.968 | 4.51E-04 | 3.346 | 1.51E-02 | Hyp_SEVh x Hyp_PBS  Hyp_SEVh x Norm_PBS  Norm_SEVh x Hyp_SEVh |
| RL26 | 60S ribosomal protein L26 | 19.904 | 4.56E-04 | 3.341 | 1.51E-02 | Norm_PBS x Hyp_PBS  Norm_SEVh x Hyp_PBS  Hyp_SEVh x Norm_PBS  Norm_SEVh x Hyp_SEVh |
| IDHP | Isocitrate dehydrogenase [NADP], mitochondrial | 19.478 | 4.92E-04 | 3.308 | 1.61E-02 | Norm_PBS x Hyp_PBS  Hyp_SEVh x Norm_PBS  Norm_SEVh x Norm_PBS |
| H12 | Histone H1.2 | 18.579 | 5.79E-04 | 3.237 | 1.87E-02 | Norm_PBS x Hyp_PBS  Norm_SEVh x Hyp_PBS  Hyp_SEVh x Norm_PBS  Norm_SEVh x Hyp_SEVh |
| MD2L1 | Mitotic spindle assembly checkpoint protein MAD2A | 17.398 | 7.26E-04 | 3.139 | 2.31E-02 | Hyp_SEVh x Hyp_PBS  Hyp_SEVh x Norm_PBS  Norm_SEVh x Hyp_SEVh |
| TBB2A | Tubulin beta-2A chain | 16.957 | 7.92E-04 | 3.101 | 2.46E-02 | Norm_PBS x Hyp_PBS  Norm_SEVh x Hyp_PBS  Hyp_SEVh x Norm_PBS  Norm_SEVh x Hyp_SEVh |
| GSH1 | Glutamate--cysteine ligase catalytic subunit | 16.924 | 7.97E-04 | 3.098 | 2.46E-02 | Norm_PBS x Hyp_PBS  Norm_SEVh x Hyp_PBS  Hyp_SEVh x Norm_PBS  Norm_SEVh x Hyp_SEVh |
| ACO13 | Acyl-coenzyme A thioesterase 13 | 16.919 | 7.98E-04 | 3.098 | 2.46E-02 | Norm_PBS x Hyp_PBS  Hyp_SEVh x Norm_PBS  Norm_SEVh x Norm_PBS |
| AIP | AH receptor-interacting protein | 16.711 | 8.33E-04 | 3.080 | 2.53E-02 | Norm_PBS x Hyp_PBS  Hyp_SEVh x Norm_PBS  Norm_SEVh x Norm_PBS |
| PQBP1 | Polyglutamine-binding protein 1 | 16.431 | 8.82E-04 | 3.055 | 2.65E-02 | Hyp_SEVh x Hyp_PBS  Hyp_SEVh x Norm_PBS  Norm_SEVh x Hyp_SEVh |
| NDRG1 | Protein NDRG1 | 16.27 | 9.12E-04 | 3.040 | 2.71E-02 | Norm_PBS x Hyp_PBS  Norm_SEVh x Hyp_PBS  Hyp_SEVh x Norm_PBS  Norm_SEVh x Hyp_SEVh |
| DSC1 | Desmocollin-1 | 16.051 | 9.54E-04 | 3.020 | 2.80E-02 | Norm_PBS x Hyp_PBS  Norm_SEVh x Hyp_PBS  Hyp_SEVh x Norm_PBS  Norm_SEVh x Hyp_SEVh |
| F107B | Protein FAM107B | 15.403 | 1.10E-03 | 2.960 | 3.15E-02 | Norm_PBS x Hyp_PBS  Norm_SEVh x Hyp_PBS  Hyp_SEVh x Norm_PBS  Norm_SEVh x Hyp_SEVh |
| MUCL1 | Mucin-like protein 1 | 15.397 | 1.10E-03 | 2.960 | 3.15E-02 | Norm_PBS x Hyp_PBS  Hyp_SEVh x Hyp_PBS  Norm_SEVh x Hyp_PBS |
| PDIA1 | Protein disulfide-isomerase | 15.129 | 1.16E-03 | 2.934 | 3.31E-02 | Norm_PBS x Hyp_PBS  Norm_SEVh x Hyp_PBS  Hyp_SEVh x Norm_PBS |
| SRP68 | Signal recognition particle subunit SRP68 | 14.926 | 1.22E-03 | 2.914 | 3.42E-02 | Norm_PBS x Hyp_PBS  Norm_SEVh x Hyp_PBS  Hyp_SEVh x Norm_PBS  Norm_SEVh x Hyp_SEVh |
| COASY | Bifunctional coenzyme A synthase | 14.79 | 1.26E-03 | 2.901 | 3.49E-02 | Hyp_SEVh x Hyp_PBS  Hyp_SEVh x Norm_PBS  Norm_SEVh x Hyp_SEVh |
| BPNT1 | 3'(2'),5'-bisphosphate nucleotidase 1 | 14.572 | 1.32E-03 | 2.880 | 3.63E-02 | Norm_PBS x Hyp_PBS  Hyp_SEVh x Hyp_PBS  Norm_SEVh x Norm_PBS |
| RL1D1 | Ribosomal L1 domain-containing protein 1 | 14.084 | 1.48E-03 | 2.831 | 4.02E-02 | Norm_PBS x Hyp_PBS  Norm_SEVh x Hyp_PBS  Hyp_SEVh x Norm_PBS  Norm_SEVh x Hyp_SEVh |
| UBR7 | Putative E3 ubiquitin-protein ligase UBR7 | 13.988 | 1.51E-03 | 2.821 | 4.07E-02 | Norm_PBS x Hyp_PBS  Hyp_SEVh x Norm_PBS  Norm_SEVh x Norm_PBS |
| ASNS | Asparagine synthetase [glutamine-hydrolyzing] | 13.848 | 1.56E-03 | 2.807 | 4.17E-02 | Norm_PBS x Hyp_PBS  Norm_SEVh x Hyp_PBS  Hyp_SEVh x Norm_PBS  Norm_SEVh x Hyp_SEVh |
| NQO2 | Ribosyldihydronicotinamide dehydrogenase [quinone] | 13.381 | 1.75E-03 | 2.758 | 4.62E-02 | Norm_PBS x Hyp_PBS  Hyp_SEVh x Norm_PBS |
| UBP7 | Ubiquitin carboxyl-terminal hydrolase 7 | 13.046 | 1.90E-03 | 2.722 | 4.96E-02 | Norm_PBS x Hyp_PBS  Norm_SEVh x Hyp_PBS  Norm_SEVh x Hyp_SEVh |

* FDR: False discovery rate; ** Tukey’s HSD: Tukey’s honest significant difference
