# Supplementary material for: Small Extracellular Vesicles from Hypoxic Triple-Negative Breast Cancer Cells induce Oxygen-dependent Cell Invasion
Source: Preprints.org preprint supplement (doi:10.20944/preprints202208.0462.v1), 2022-08-26
Supplement: Supplementary file 2 [file supplementary]

**Supplementary Figure 1. Additional methodological details** (a) Integrin immunophenotyping gating strategy for flow cytometry analysis; (b) Parameters for quantification of cell morphology: (1) Cell circularity, (2) Aspect Ratio and (3) Perimeter/Area; (c) Apoptosis assay controls and gating strategy, including unstained controls incubated in normoxia and hypoxia, single stained controls for annexin-V and 7AAD, and double stained controls for live and dead cells. Values represent the percentage of cells in each quadrant.

**Supplementary Figure 2. Cell invasion in acute hypoxia** (a) Invasion index (%) for 6h in Matrigel (mean  $\pm$  SEM) (b) Comparison of degraded area after 48 h incubation in normoxia (20% O<sub>2</sub>) or hypoxia (1% O<sub>2</sub>) of negative control (FBS-), positive control (FBS+) and treated cells (SEVh); data shown as median  $\pm$  interquartile range (c) Representative images of 24h gelatin degradation assay in light microscopy (LM), and fluorescent-labelled nuclei (DAPI, blue), tubulin (AlexaFluor647, pink) and gelatin (0.2 mg/ml, fluorescein, green); overlaid images below. Degradation spots in gelatin coating (black) are signaled with white arrows. Scale bars: 20  $\mu$ m. Proteolytic activity from gelatin degradation assay supernatant of (d) MMP-2 (mean  $\pm$  SD) and (e) MMP-9 (mean  $\pm$  SD), with zymograms displayed over each graph. \*p<0.05

**Supplementary Figure 3. Migratory morphology is induced by SEVh in Matrigel.** Additional parameters for assessing cell morphology (n=300). (a-c) Aspect ratio (AR) of cells after 24h and 48h for cells adhered to (a) an uncoated substrate, (b) gelatin coating (0.2 mg/ml) or (c) Matrigel coating (1:1, v/v); data displayed as median  $\pm$  interquartile range. (d-f) Perimeter per area ratio obtained from cells incubated for 24h and 48h for cells adhered to (d) an uncoated substrate, (e) gelatin coating (0.2 mg/ml) or (f) Matrigel coating (1:1, v/v); data shown as median  $\pm$  interquartile range. \*p<0.05
